# Supplementary material for: Effect of the reaction conditions on the performance of Au–Pd/TiO2 catalyst for the direct synthesis of hydrogen peroxide
Source: Royal Society of Chemistry journal article supplement (doi:10.1039/b921815g), 2010-01-01
Supplement: b921815g.pdf [file b921815g.pdf]

Supplementary Material for PCCP

This journal is © The Owner Societies 2010

**The effect of the reaction conditions on the performance of Au-Pd/TiO<sub>2</sub> catalyst for the direct synthesis of hydrogen peroxide**

**Supplementary Data**

Marco Piccinini, Edwin Ntainjua N., Jennifer K. Edwards, Albert F. Carley, Jacob A. Moulijn, and  
Graham J. Hutchings

Cardiff Catalysis Institute, Cardiff University, School of Chemistry, Main Building, Park Place,  
Cardiff, CF10 3AT, UK

| <b>H<sub>2</sub></b> |                |                         |               |                |                         |         |
|----------------------|----------------|-------------------------|---------------|----------------|-------------------------|---------|
| <b>T (°C)</b>        | <b>P (MPa)</b> | <b>Methanol (mg/Kg)</b> | <b>T (°C)</b> | <b>P (MPa)</b> | <b>Methanol (mg/Kg)</b> |         |
| - 24                 | 0.0006         | 0                       | 18            | 0.0117         | 0                       |         |
|                      | 0.561          | 35.647                  |               | 0.4327         | 43.786                  |         |
|                      | 1.361          | 92.647                  |               | 1.292          | 122.757                 |         |
|                      | 2.271          | 151.011                 |               | 2.514          | 235.313                 |         |
| - 10                 | 0.0021         | 0                       | 20            | 3.104          | 299.643                 |         |
|                      | 0.482          | 36.272                  |               | 0.1013         | 10 <sup>23</sup>        |         |
|                      | 0.967          | 67.589                  |               | 35             | 0.0277                  | 0       |
|                      | 1.55           | 115.225                 |               | 0.752          | 83.869                  |         |
|                      | 2.04           | 147.243                 |               | 1.383          | 162.95                  |         |
|                      | 3.026          | 213.27                  |               | 2.635          | 304.064                 |         |
|                      | 5              | 0.0062                  |               | 0              | 3.427                   | 389.436 |
| 5                    | 0.4533         | 38.776                  | 35            | 0.0277         | 0                       |         |
|                      | 0.603          | 51.297                  |               | 0.752          | 83.869                  |         |
|                      | 0.92           | 77.602                  |               | 1.383          | 162.95                  |         |
|                      | 1.319          | 117.735                 |               | 2.635          | 304.064                 |         |
|                      | 1.558          | 133.427                 |               | 3.427          | 389.436                 |         |
|                      | 1.984          | 178.037                 |               |                |                         |         |
|                      | 2.564          | 217.678                 |               |                |                         |         |
|                      | 3.011          | 259.263                 |               |                |                         |         |

| <b>T (°C)</b> | <b>P (MPa)</b> | <b>Water (mg/Kg)</b> |
|---------------|----------------|----------------------|
| 20            | 0.1013         | 1.62 <sup>23</sup>   |
| 30            | 0.1013         | 1.46 <sup>24</sup>   |
| 40            | 0.1013         | 1.38 <sup>24</sup>   |

| <b>O<sub>2</sub></b> |                |                         |
|----------------------|----------------|-------------------------|
| <b>T (°C)</b>        | <b>P (MPa)</b> | <b>Methanol (mg/Kg)</b> |
| 20                   | 0.1013         | 409 <sup>23</sup>       |

| <b>T (°C)</b> | <b>P (MPa)</b> | <b>Water (mg/Kg)</b> |
|---------------|----------------|----------------------|
| 20            | 0.1013         | 40 <sup>23</sup>     |
| 30            | 0.1013         | 35 <sup>24</sup>     |
| 40            | 0.1013         | 31 <sup>24</sup>     |

<sup>23,24,25</sup> references in the main body of the text.
